# Supplementary material for: Expression of Membranous CD155 Is Associated with Aggressive Phenotypes and a Poor Prognosis in Patients with Bladder Cancer
Source: MDPI journal article supplement (doi:10.3390/cancers14061576), 2022-03-19
Supplement: s1 [file s1]

(A)

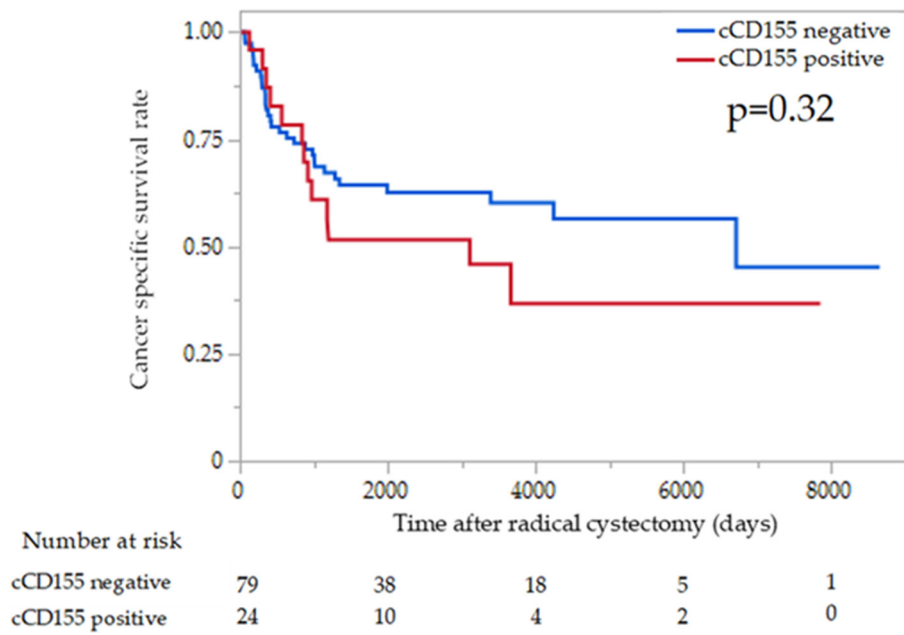

(B)

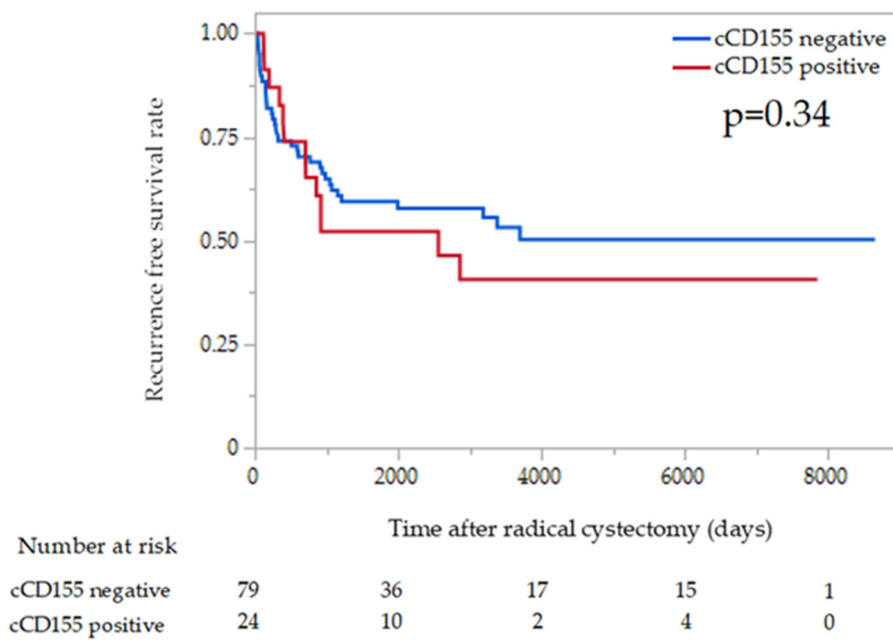

**Figure S1.** Probability of survival in patients with urothelial carcinoma of the bladder according to cCD155 expression estimated using the Kaplan–Meier method. (A) Cancer-specific survival, (B) Recurrence-free survival.
